# Supplementary material
Source: Springer Nature journal article supplement (https://www.springermedizin.de/resource/supplementary/12875_2013_929_MOESM2_ESM.pdf/9435446)

**Round 1 (N = 44)**

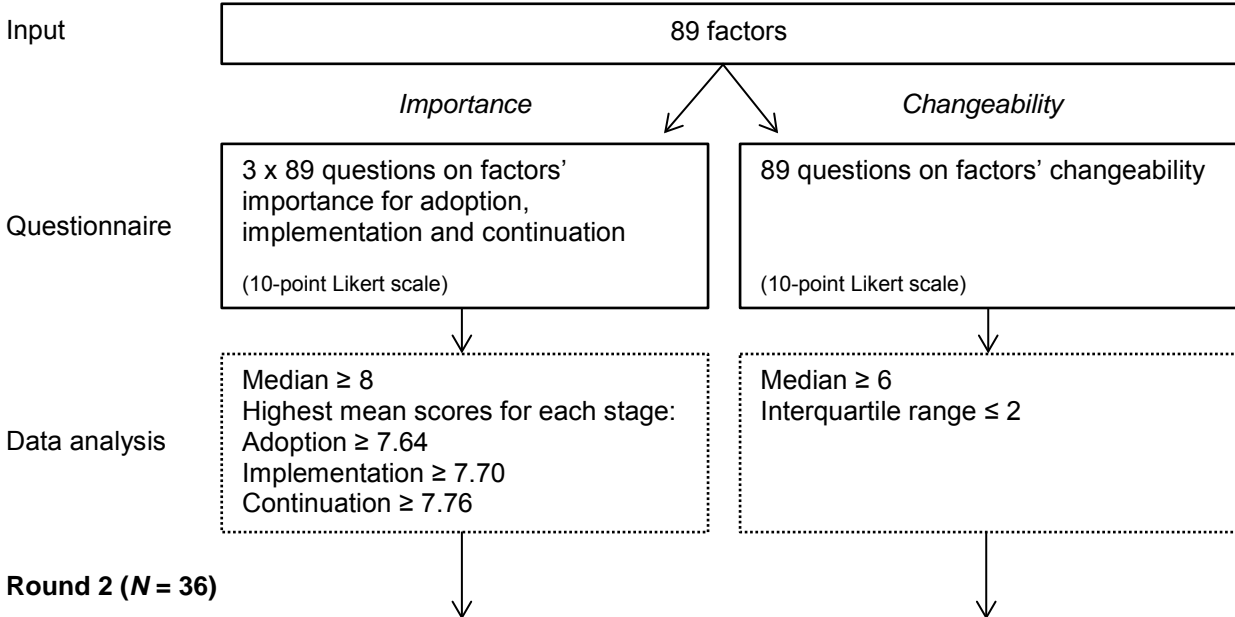

**Round 2 (N = 36)**

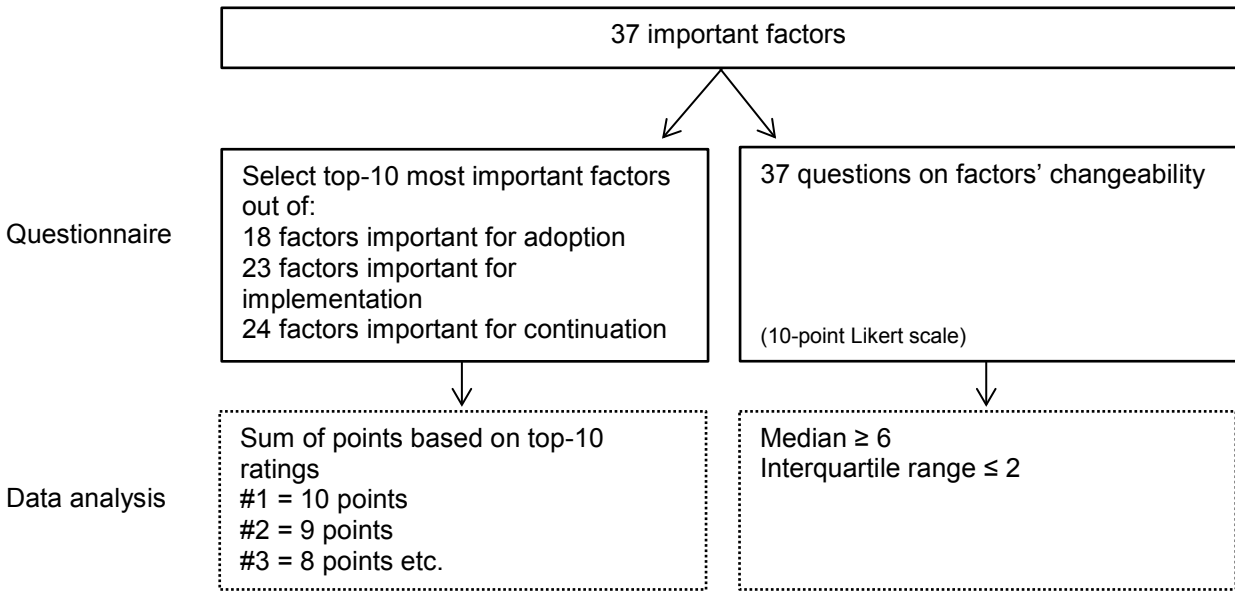

Supplement: MOESM2 [file 9435446]
